# Supplementary material for: A new copper chloride chain by supported hydrogen bonding
Source: Royal Society of Chemistry journal article supplement (doi:10.1039/c3ce40692j), 2013-01-01
Supplement: c3ce40692j.pdf [file c3ce40692j.pdf]

Cite this: DOI: 10.1039/c0xx00000x

www.rsc.org/xxxxxx

ARTICLE TYPE

## Supplementary information A new copper chloride chain by supported hydrogen bonding

Matti Tuikka,<sup>a</sup> Matti Haukka<sup>b</sup>, and Ülo Kersen<sup>c\*</sup>

Received (in XXX, XXX) Xth XXXXXXXXXX 20XX, Accepted Xth XXXXXXXXXX 20XX

DOI: 10.1039/b000000x

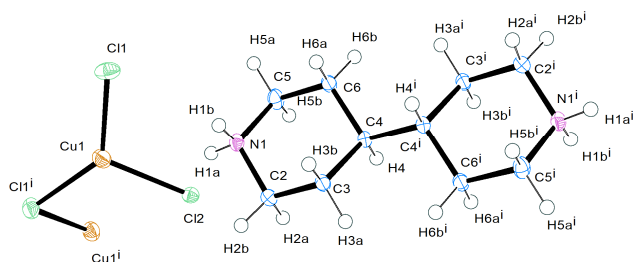

Figure 1. Showing the atomic thermal ellipsoid plot (50% probability level) and atomic numbering scheme for compound 1.

Table 1. Crystal data and structure refinement for compound 1.

|                                   |                                                         |                                                                         |
|-----------------------------------|---------------------------------------------------------|-------------------------------------------------------------------------|
| Identification code               | 1                                                       |                                                                         |
| Empirical formula                 | C10 H22 Cl4 Cu2 N2                                      |                                                                         |
| Formula weight                    | 439.18                                                  |                                                                         |
| Temperature                       | 100(2) K                                                |                                                                         |
| Wavelength                        | 0.71073 Å                                               |                                                                         |
| Crystal system                    | Monoclinic                                              |                                                                         |
| Space group                       | P 21/c                                                  |                                                                         |
| Unit cell dimensions              | a = 8.4958(5) Å<br>b = 15.7766(10) Å<br>c = 5.9616(4) Å | $\alpha = 90^\circ$<br>$\beta = 99.269(3)^\circ$<br>$\gamma = 90^\circ$ |
| Volume                            | 788.63(9) Å <sup>3</sup>                                |                                                                         |
| Z                                 | 2                                                       |                                                                         |
| Density (calculated)              | 1.849 Mg/m <sup>3</sup>                                 |                                                                         |
| Absorption coefficient            | 3.358 mm <sup>-1</sup>                                  |                                                                         |
| F(000)                            | 444                                                     |                                                                         |
| Crystal size                      | 0.20 x 0.20 x 0.04 mm <sup>3</sup>                      |                                                                         |
| Theta range for data collection   | 2.43 to 29.60°                                          |                                                                         |
| Index ranges                      | -11 ≤ h ≤ 11, -21 ≤ k ≤ 20, -8 ≤ l ≤ 8                  |                                                                         |
| Reflections collected             | 8107                                                    |                                                                         |
| Independent reflections           | 2206 [R(int) = 0.0233]                                  |                                                                         |
| Completeness to theta = 29.60°    | 99.3 %                                                  |                                                                         |
| Absorption correction             | Numerical                                               |                                                                         |
| Max. and min. transmission        | 0.8774 and 0.5532                                       |                                                                         |
| Refinement method                 | Full-matrix least-squares on F <sup>2</sup>             |                                                                         |
| Data / restraints / parameters    | 2206 / 0 / 90                                           |                                                                         |
| Goodness-of-fit on F <sup>2</sup> | 1.033                                                   |                                                                         |
| Final R indices [I > 2σ(I)]       | R1 = 0.0208, wR2 = 0.0465                               |                                                                         |
| R indices (all data)              | R1 = 0.0261, wR2 = 0.0486                               |                                                                         |
| Largest diff. peak and hole       | 0.441 and -0.479 e.Å <sup>-3</sup>                      |                                                                         |

10

**Table 2.** Atomic coordinates ( $\times 10^4$ ) and equivalent isotropic displacement parameters ( $\text{\AA}^2 \times 10^3$ ) for compound 1. U(eq) is defined as one third of the trace of the orthogonalized  $U^{ij}$  tensor.

|    | x     | y       | z        | U(eq)   |       |
|----|-------|---------|----------|---------|-------|
| 5  |       |         |          |         |       |
|    | Cu(1) | 6750(1) | 7685(1)  | 2213(1) | 23(1) |
|    | Cl(1) | 7697(1) | 6607(1)  | 4427(1) | 26(1) |
|    | Cl(2) | 4421(1) | 8324(1)  | 2890(1) | 16(1) |
|    | N(1)  | 3302(1) | 8677(1)  | 7629(2) | 15(1) |
| 10 |       |         |          |         |       |
|    | C(2)  | 1624(2) | 8386(1)  | 7613(2) | 17(1) |
|    | C(3)  | 496(2)  | 8810(1)  | 5714(2) | 15(1) |
|    | C(4)  | 587(2)  | 9778(1)  | 5921(2) | 12(1) |
|    | C(5)  | 3468(2) | 9618(1)  | 7744(2) | 18(1) |
| 15 |       |         |          |         |       |
|    | C(6)  | 2316(2) | 10042(1) | 5868(2) | 15(1) |

**Table 3.** Selected bond lengths [ $\text{\AA}$ ] and angles [ $^\circ$ ] for compound 1.

|    |               |           |
|----|---------------|-----------|
|    | Cu(1)-Cl(1)   | 2.2227(4) |
|    | Cu(1)-Cl(1)#1 | 2.2552(4) |
| 20 |               |           |
|    | Cu(1)-Cl(2)   | 2.3138(4) |
|    | Cu(1)-Cu(1)#1 | 3.0373(2) |
|    | Cl(1)-Cu(1)#2 | 2.2552(4) |

Symmetry transformations used to generate equivalent atoms:

25 #1  $x, -y+3/2, z-1/2$  #2  $x, -y+3/2, z+1/2$

**Table 4.** Bond lengths [ $\text{\AA}$ ] and angles [ $^\circ$ ] for compound 1.

|    |                       |             |
|----|-----------------------|-------------|
|    | Cu(1)-Cl(1)           | 2.2227(4)   |
|    | Cu(1)-Cl(1)#1         | 2.2552(4)   |
|    | Cu(1)-Cl(2)           | 2.3138(4)   |
| 30 |                       |             |
|    | Cu(1)-Cu(1)#1         | 3.0373(2)   |
|    | Cu(1)-Cu(1)#2         | 3.0373(2)   |
|    | Cl(1)-Cu(1)#2         | 2.2552(4)   |
|    | N(1)-C(5)             | 1.4919(19)  |
|    | N(1)-C(2)             | 1.4961(18)  |
| 35 |                       |             |
|    | N(1)-H(1A)            | 0.86(2)     |
|    | N(1)-H(1B)            | 0.895(19)   |
|    | C(2)-C(3)             | 1.5157(18)  |
|    | C(2)-H(2A)            | 0.9900      |
|    | C(2)-H(2B)            | 0.9900      |
| 40 |                       |             |
|    | C(3)-C(4)             | 1.5333(19)  |
|    | C(3)-H(3A)            | 0.9900      |
|    | C(3)-H(3B)            | 0.9900      |
|    | C(4)-C(4)#3           | 1.530(2)    |
|    | C(4)-C(6)             | 1.5314(18)  |
| 45 |                       |             |
|    | C(4)-H(4)             | 1.0000      |
|    | C(5)-C(6)             | 1.5180(19)  |
|    | C(5)-H(5A)            | 0.9900      |
|    | C(5)-H(5B)            | 0.9900      |
|    | C(6)-H(6A)            | 0.9900      |
|    | C(6)-H(6B)            | 0.9900      |
| 50 |                       |             |
|    | Cl(1)-Cu(1)-Cl(1)#1   | 132.75(2)   |
|    | Cl(1)-Cu(1)-Cl(2)     | 117.905(15) |
|    | Cl(1)#1-Cu(1)-Cl(2)   | 109.194(16) |
| 55 |                       |             |
|    | Cl(1)-Cu(1)-Cu(1)#1   | 112.253(15) |
|    | Cl(1)#1-Cu(1)-Cu(1)#1 | 46.843(11)  |
|    | Cl(2)-Cu(1)-Cu(1)#1   | 112.958(10) |
|    | Cl(1)-Cu(1)-Cu(1)#2   | 47.742(11)  |
|    | Cl(1)#1-Cu(1)-Cu(1)#2 | 150.964(13) |
| 60 |                       |             |
|    | Cl(2)-Cu(1)-Cu(1)#2   | 77.136(10)  |
|    | Cu(1)#1-Cu(1)-Cu(1)#2 | 157.867(15) |
|    | Cu(1)-Cl(1)-Cu(1)#2   | 85.416(14)  |
|    | C(5)-N(1)-C(2)        | 112.87(11)  |
|    | C(5)-N(1)-H(1A)       | 108.9(13)   |
| 65 |                       |             |
|    | C(2)-N(1)-H(1A)       | 106.6(13)   |
|    | C(5)-N(1)-H(1B)       | 108.0(12)   |
|    | C(2)-N(1)-H(1B)       | 110.3(12)   |
|    | H(1A)-N(1)-H(1B)      | 110.2(18)   |
|    | N(1)-C(2)-C(3)        | 110.90(11)  |
| 70 |                       |             |
|    | N(1)-C(2)-H(2A)       | 109.5       |
|    | C(3)-C(2)-H(2A)       | 109.5       |
|    | N(1)-C(2)-H(2B)       | 109.5       |
|    | C(3)-C(2)-H(2B)       | 109.5       |
|    | H(2A)-C(2)-H(2B)      | 108.0       |
| 75 |                       |             |
|    | C(2)-C(3)-C(4)        | 111.19(11)  |
|    | C(2)-C(3)-H(3A)       | 109.4       |
|    | C(4)-C(3)-H(3A)       | 109.4       |
|    | C(2)-C(3)-H(3B)       | 109.4       |
|    | C(4)-C(3)-H(3B)       | 109.4       |
| 80 |                       |             |
|    | H(3A)-C(3)-H(3B)      | 108.0       |
|    | C(4)#3-C(4)-C(6)      | 112.18(14)  |
|    | C(4)#3-C(4)-C(3)      | 112.28(13)  |
|    | C(6)-C(4)-C(3)        | 107.81(11)  |
|    | C(4)#3-C(4)-H(4)      | 108.1       |
| 85 |                       |             |
|    | C(6)-C(4)-H(4)        | 108.1       |
|    | C(3)-C(4)-H(4)        | 108.1       |
|    | N(1)-C(5)-C(6)        | 111.08(11)  |
|    | N(1)-C(5)-H(5A)       | 109.4       |
|    | C(6)-C(5)-H(5A)       | 109.4       |
| 90 |                       |             |
|    | N(1)-C(5)-H(5B)       | 109.4       |
|    | C(6)-C(5)-H(5B)       | 109.4       |
|    | H(5A)-C(5)-H(5B)      | 108.0       |
|    | C(5)-C(6)-C(4)        | 111.83(11)  |
| 95 |                       |             |
|    | C(5)-C(6)-H(6A)       | 109.3       |
|    | C(4)-C(6)-H(6A)       | 109.3       |
|    | C(5)-C(6)-H(6B)       | 109.3       |
|    | C(4)-C(6)-H(6B)       | 109.3       |
|    | H(6A)-C(6)-H(6B)      | 107.9       |

100 Symmetry transformations used to generate equivalent atoms:

#1  $x, -y+3/2, z-1/2$  #2  $x, -y+3/2, z+1/2$  #3  $-x, -y+2, -z+1$

**Table 5.** Anisotropic displacement parameters ( $\text{\AA}^2 \times 10^3$ ) for compound **1**. The anisotropic displacement factor exponent takes the form:  $-2p2[ h^2 a^2 U_{11} + \dots + 2 h k a^* b^* U_{12} ]$

|         | U <sup>11</sup> | U <sup>22</sup> | U <sup>33</sup> | U <sup>23</sup> | U <sup>13</sup> | U <sup>12</sup> |
|---------|-----------------|-----------------|-----------------|-----------------|-----------------|-----------------|
| 5 Cu(1) | 22(1)           | 18(1)           | 27(1)           | 2(1)            | 2(1)            | -1(1)           |
| Cl(1)   | 31(1)           | 25(1)           | 23(1)           | 6(1)            | 13(1)           | 10(1)           |
| Cl(2)   | 18(1)           | 16(1)           | 13(1)           | 0(1)            | 4(1)            | -1(1)           |
| N(1)    | 15(1)           | 16(1)           | 12(1)           | 2(1)            | 1(1)            | 4(1)            |
| 10 C(2) | 16(1)           | 16(1)           | 20(1)           | 6(1)            | 4(1)            | 2(1)            |
| C(3)    | 13(1)           | 12(1)           | 18(1)           | 2(1)            | 1(1)            | 1(1)            |
| C(4)    | 13(1)           | 12(1)           | 12(1)           | 0(1)            | 1(1)            | 2(1)            |
| C(5)    | 16(1)           | 16(1)           | 20(1)           | -1(1)           | -4(1)           | 1(1)            |
| C(6)    | 14(1)           | 12(1)           | 19(1)           | 2(1)            | -1(1)           | 0(1)            |

15

**Table 6.** Hydrogen coordinates ( $\times 10^4$ ) and isotropic displacement parameters ( $\text{\AA}^2 \times 10^{-3}$ ) for compound **1**.

|          | x        | y        | z        | U(eq) |
|----------|----------|----------|----------|-------|
| 20 H(1A) | 3860(20) | 8460(12) | 8810(30) | 26(5) |
| H(1B)    | 3660(20) | 8498(11) | 6380(30) | 19(4) |
| H(2A)    | 1295     | 8523     | 9091     | 21    |
| H(2B)    | 1566     | 7764     | 7409     | 21    |
| 25 H(3A) | -609     | 8622     | 5769     | 18    |
| H(3B)    | 772      | 8636     | 4231     | 18    |
| H(4)     | 314      | 9940     | 7434     | 15    |
| H(5A)    | 4574     | 9777     | 7598     | 21    |
| H(5B)    | 3257     | 9820     | 9240     | 21    |
| 30 H(6A) | 2605     | 9889     | 4377     | 18    |
| H(6B)    | 2410     | 10665    | 6040     | 18    |

**Table 7.** Hydrogen bonds for compound **1** [ $\text{\AA}$  and  $^\circ$ ].

35

| D-H...A                     | d(D-H)    | d(H...A)   | d(D...A)   | $\angle$ (DHA) |
|-----------------------------|-----------|------------|------------|----------------|
| N(1)-H(1A)...Cl(2)#40.86(2) | 2.41(2)   | 3.1766(12) | 149.3(17)  |                |
| N(1)-H(1B)...Cl(2)          | 0.895(19) | 2.291(19)  | 3.1717(12) | 167.8(16)      |

40

Symmetry transformations used to generate equivalent atoms:

#1  $x, -y+3/2, z-1/2$  #2  $x, -y+3/2, z+1/2$  #3  $-x, -y+2, -z+1$

#4  $x, y, z+1$

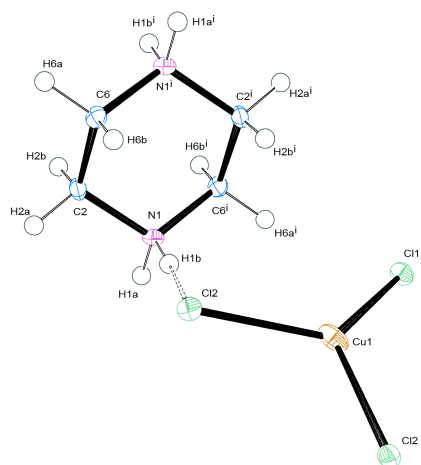

**Figure 2.** Showing the atomic thermal ellipsoid plot (50% probability level) and atomic numbering scheme for compound **2**.

**Table 8.** Crystal data and structure refinement for compound **2**.

|                                   |                                                                  |          |
|-----------------------------------|------------------------------------------------------------------|----------|
| Identification code               | 2                                                                |          |
| Empirical formula                 | C <sub>4</sub> H <sub>12</sub> Cl <sub>4</sub> Cu N <sub>2</sub> |          |
| Formula weight                    | 293.50                                                           |          |
| Temperature                       | 100(2) K                                                         |          |
| Wavelength                        | 0.71073 Å                                                        |          |
| Crystal system                    | Tetragonal                                                       |          |
| Space group                       | P 43 21 2                                                        |          |
| Unit cell dimensions              | a = 7.6443(4) Å                                                  | α = 90°. |
|                                   | b = 7.6443(4) Å                                                  | β = 90°. |
|                                   | c = 19.1597(12) Å                                                | γ = 90°. |
| Volume                            | 1119.60(11) Å <sup>3</sup>                                       |          |
| Z                                 | 4                                                                |          |
| Density (calculated)              | 1.741 Mg/m <sup>3</sup>                                          |          |
| Absorption coefficient            | 2.853 mm <sup>-1</sup>                                           |          |
| F(000)                            | 588                                                              |          |
| Crystal size                      | 0.76 x 0.60 x 0.49 mm <sup>3</sup>                               |          |
| Theta range for data collection   | 2.87 to 29.00°                                                   |          |
| Index ranges                      | -10 ≤ h ≤ 8, -10 ≤ k ≤ 8, -9 ≤ l ≤ 26                            |          |
| Reflections collected             | 5271                                                             |          |
| Independent reflections           | 1474 [R(int) = 0.0215]                                           |          |
| Completeness to theta = 29.00°    | 98.4 %                                                           |          |
| Absorption correction             | Semi-empirical from equivalents                                  |          |
| Max. and min. transmission        | 0.3378 and 0.2192                                                |          |
| Refinement method                 | Full-matrix least-squares on F <sup>2</sup>                      |          |
| Data / restraints / parameters    | 1474 / 0 / 60                                                    |          |
| Goodness-of-fit on F <sup>2</sup> | 1.059                                                            |          |
| Final R indices [I > 2σ(I)]       | R1 = 0.0154, wR2 = 0.0366                                        |          |
| R indices (all data)              | R1 = 0.0163, wR2 = 0.0368                                        |          |
| Absolute structure parameter      | 0.027(10)                                                        |          |
| Extinction coefficient            | 0.0034(9)                                                        |          |
| Largest diff. peak and hole       | 0.288 and -0.280 e.Å <sup>-3</sup>                               |          |

5

**Table 9.** Atomic coordinates (x 10<sup>4</sup>) and equivalent isotropic displacement parameters (Å<sup>2</sup> × 10<sup>3</sup>) for compound **2**. U(eq) is defined as one third of the trace of the orthogonalized U<sub>ij</sub> tensor.

|    | x     | y       | z       | U(eq)   |       |
|----|-------|---------|---------|---------|-------|
| 10 |       |         |         |         |       |
|    | Cl(1) | 3433(1) | 6385(1) | 5680(1) | 19(1) |
|    | Cu(1) | 4058(1) | 4058(1) | 5000    | 14(1) |
|    | Cl(2) | 2083(1) | 4501(1) | 4158(1) | 17(1) |
|    | N(1)  | 4488(2) | 3145(2) | 2832(1) | 15(1) |
| 15 |       |         |         |         |       |
|    | C(2)  | 3842(2) | 4765(2) | 2486(1) | 16(1) |
|    | C(6)  | 6124(2) | 2470(2) | 2503(1) | 17(1) |

**Table 10.** Selected bond lengths [Å] and angles [°] for compound **2**.

|             |           |
|-------------|-----------|
| Cl(1)-Cu(1) | 2.2559(4) |
| Cu(1)-Cl(2) | 2.2351(4) |

**Table 11.** Bond lengths [Å] and angles [°] for compound **2**.

|                       |            |
|-----------------------|------------|
| Cl(1)-Cu(1)           | 2.2559(4)  |
| Cu(1)-Cl(2)           | 2.2351(4)  |
| Cu(1)-Cl(2)#1         | 2.2351(4)  |
| Cu(1)-Cl(1)#1         | 2.2559(4)  |
| N(1)-C(2)             | 1.4897(19) |
| N(1)-C(6)             | 1.4926(18) |
| N(1)-H(1A)            | 0.862(17)  |
| N(1)-H(1B)            | 0.852(17)  |
| C(2)-C(2)#2           | 1.507(3)   |
| C(2)-H(2A)            | 0.9900     |
| C(2)-H(2B)            | 0.9900     |
| C(6)-C(6)#2           | 1.520(3)   |
| C(6)-H(6A)            | 0.9900     |
| C(6)-H(6B)            | 0.9900     |
| Cl(2)-Cu(1)-Cl(2)#1   | 136.54(2)  |
| Cl(2)-Cu(1)-Cl(1)     | 98.879(14) |
| Cl(2)#1-Cu(1)-Cl(1)   | 98.497(13) |
| Cl(2)-Cu(1)-Cl(1)#1   | 98.498(13) |
| Cl(2)#1-Cu(1)-Cl(1)#1 | 98.879(13) |
| Cl(1)-Cu(1)-Cl(1)#1   | 131.85(2)  |
| C(2)-N(1)-C(6)        | 112.09(10) |
| C(2)-N(1)-H(1A)       | 109.8(12)  |
| C(6)-N(1)-H(1A)       | 109.5(13)  |
| C(2)-N(1)-H(1B)       | 106.6(12)  |
| C(6)-N(1)-H(1B)       | 111.5(12)  |
| H(1A)-N(1)-H(1B)      | 107.2(16)  |
| N(1)-C(2)-C(2)#2      | 109.68(10) |
| N(1)-C(2)-H(2A)       | 109.7      |
| C(2)#2-C(2)-H(2A)     | 109.7      |
| N(1)-C(2)-H(2B)       | 109.7      |
| C(2)#2-C(2)-H(2B)     | 109.7      |
| H(2A)-C(2)-H(2B)      | 108.2      |
| N(1)-C(6)-C(6)#2      | 110.52(9)  |
| N(1)-C(6)-H(6A)       | 109.5      |
| C(6)#2-C(6)-H(6A)     | 109.5      |
| N(1)-C(6)-H(6B)       | 109.5      |
| C(6)#2-C(6)-H(6B)     | 109.5      |
| H(6A)-C(6)-H(6B)      | 108.1      |

Symmetry transformations used to generate equivalent atoms:

#1 y,x,-z+1 #2 -y+1,-x+1,-z+1/2

**Table 12.** Anisotropic displacement parameters ( $\text{\AA}^2 \times 10^3$ ) for compound **2**. The anisotropic displacement factor exponent takes the form:  $-2p2[ h^2 a^* 2U11 + \dots + 2 h k a^* b^* U12 ]$

|       | U <sup>11</sup> | U <sup>22</sup> | U <sup>33</sup> | U <sup>23</sup> | U <sup>13</sup> | U <sup>12</sup> |
|-------|-----------------|-----------------|-----------------|-----------------|-----------------|-----------------|
| Cl(1) | 30(1)           | 16(1)           | 13(1)           | -2(1)           | -3(1)           | 5(1)            |
| Cu(1) | 16(1)           | 16(1)           | 11(1)           | 0(1)            | 0(1)            | 3(1)            |
| Cl(2) | 17(1)           | 19(1)           | 14(1)           | -2(1)           | -2(1)           | 4(1)            |
| N(1)  | 18(1)           | 16(1)           | 13(1)           | 2(1)            | 1(1)            | -4(1)           |
| C(2)  | 13(1)           | 18(1)           | 15(1)           | 3(1)            | 0(1)            | 1(1)            |
| C(6)  | 21(1)           | 14(1)           | 16(1)           | 1(1)            | 3(1)            | 4(1)            |

**Table 13.** Hydrogen coordinates ( $\times 10^4$ ) and isotropic displacement parameters ( $\text{\AA}^2 \times 10^3$ ) for compound **2**.

|       | x        | y        | z       | U(eq) |
|-------|----------|----------|---------|-------|
| H(2A) | 2773     | 5185     | 2724    | 19    |
| H(2B) | 3543     | 4510     | 1993    | 19    |
| H(6A) | 5873     | 2097     | 2018    | 21    |
| H(6B) | 6548     | 1439     | 2765    | 21    |
| H(1A) | 4670(20) | 3350(20) | 3269(9) | 28(5) |
| H(1B) | 3660(20) | 2400(20) | 2808(8) | 23(5) |

**Table 14.** Hydrogen bonds for compound **2** [Å and °].

|               | D-H...A | d(D-H)    | d(H...A)  | d(D...A)   | <(DHA)    |
|---------------|---------|-----------|-----------|------------|-----------|
| N(1)-H(1A)... | Cl(1)#1 | 0.862(17) | 2.402(17) | 3.2054(13) | 155.2(17) |
| N(1)-H(1A)... | Cl(2)   | 0.862(17) | 2.758(18) | 3.3027(13) | 122.5(15) |
| N(1)-H(1B)... | Cl(2)#3 | 0.852(17) | 2.505(18) | 3.1865(14) | 137.6(14) |
| N(1)-H(1B)... | Cl(1)#3 | 0.852(17) | 2.598(16) | 3.2497(14) | 134.1(13) |

Symmetry transformations used to generate equivalent atoms:

#1 y,x,-z+1 #2 -y+1,-x+1,-z+1/2 #3 -x+1/2,y-1/2,-z+3/4

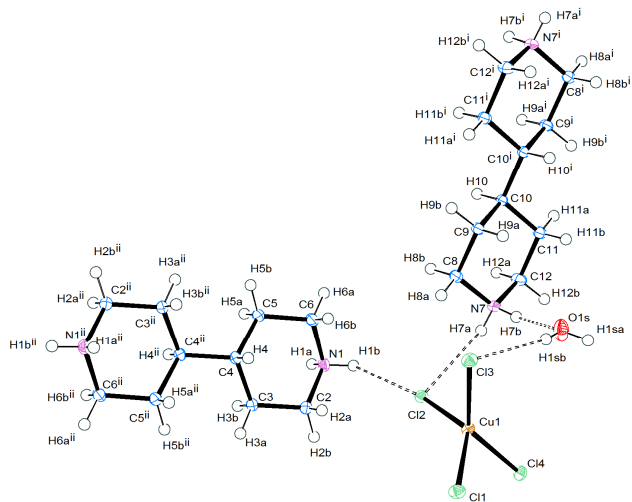

**Figure 3.** Showing the atomic thermal ellipsoid plot (50% probability level) and atomic numbering scheme for compound **3**.

5

**Table 15.** Crystal data and structure refinement for compound **3**.

|                                   |                                             |                              |
|-----------------------------------|---------------------------------------------|------------------------------|
| Identification code               | 3                                           |                              |
| Empirical formula                 | $C_{10}H_{24}Cl_4CuN_2$                     |                              |
| Formula weight                    | 393.65                                      |                              |
| Temperature                       | 100(2) K                                    |                              |
| Wavelength                        | 0.71073 Å                                   |                              |
| Crystal system                    | Triclinic                                   |                              |
| Space group                       | P-1                                         |                              |
| Unit cell dimensions              | a = 9.2245(2) Å                             | $\alpha = 76.7530(10)^\circ$ |
|                                   | b = 9.3525(2) Å                             | $\beta = 84.9900(10)^\circ$  |
|                                   | c = 9.6145(2) Å                             | $\gamma = 82.6010(10)^\circ$ |
| Volume                            | 799.23(3) Å <sup>3</sup>                    |                              |
| Z                                 | 2                                           |                              |
| Density (calculated)              | 1.636 Mg/m <sup>3</sup>                     |                              |
| Absorption coefficient            | 2.025 mm <sup>-1</sup>                      |                              |
| F(000)                            | 406                                         |                              |
| Crystal size                      | 0.48 x 0.25 x 0.18 mm <sup>3</sup>          |                              |
| Theta range for data collection   | 2.18 to 33.33°                              |                              |
| Index ranges                      | -14 ≤ h ≤ 13, -14 ≤ k ≤ 13, -14 ≤ l ≤ 14    |                              |
| Reflections collected             | 17070                                       |                              |
| Independent reflections           | 5955 [R(int) = 0.0202]                      |                              |
| Completeness to theta = 33.33°    | 96.2 %                                      |                              |
| Absorption correction             | Semi-empirical from equivalents             |                              |
| Max. and min. transmission        | 0.7094 and 0.4450                           |                              |
| Refinement method                 | Full-matrix least-squares on F <sup>2</sup> |                              |
| Data / restraints / parameters    | 5955 / 0 / 187                              |                              |
| Goodness-of-fit on F <sup>2</sup> | 1.042                                       |                              |
| Final R indices [I > 2σ(I)]       | R1 = 0.0185, wR2 = 0.0450                   |                              |
| R indices (all data)              | R1 = 0.0220, wR2 = 0.0469                   |                              |
| Largest diff. peak and hole       | 0.426 and -0.408 e.Å <sup>-3</sup>          |                              |

**Table 16.** Atomic coordinates ( $\times 10^4$ ) and equivalent isotropic displacement parameters ( $\text{Å}^2 \times 10^3$ ) for compound **3**. U(eq) is defined as one third of the trace of the orthogonalized U<sup>ij</sup> tensor.

|    | x     | y       | z       | U(eq)    |       |
|----|-------|---------|---------|----------|-------|
|    | Cu(1) | 6637(1) | 7441(1) | 915(1)   | 11(1) |
|    | Cl(1) | 8542(1) | 8774(1) | 596(1)   | 16(1) |
| 15 | Cl(2) | 6392(1) | 5011(1) | 1340(1)  | 13(1) |
|    | Cl(3) | 5797(1) | 7880(1) | 3070(1)  | 16(1) |
|    | Cl(4) | 6026(1) | 8074(1) | -1375(1) | 14(1) |
|    | O(1S) | 2713(1) | 8342(1) | 1672(1)  | 28(1) |
|    | N(1)  | 7207(1) | 1222(1) | 2426(1)  | 14(1) |
| 20 | N(7)  | 2784(1) | 5298(1) | 2042(1)  | 14(1) |
|    | C(2)  | 8679(1) | 1756(1) | 2043(1)  | 16(1) |
|    | C(3)  | 9820(1) | 737(1)  | 2951(1)  | 13(1) |
|    | C(4)  | 9430(1) | 552(1)  | 4557(1)  | 11(1) |
|    | C(5)  | 7877(1) | 89(1)   | 4894(1)  | 14(1) |
| 25 | C(6)  | 6756(1) | 1125(1) | 3971(1)  | 15(1) |
|    | C(8)  | 3237(1) | 4697(1) | 3540(1)  | 15(1) |
|    | C(9)  | 2092(1) | 5214(1) | 4607(1)  | 13(1) |
|    | C(10) | 586(1)  | 4761(1) | 4456(1)  | 11(1) |
|    | C(11) | 166(1)  | 5409(1) | 2912(1)  | 14(1) |
| 30 | C(12) | 1306(1) | 4918(1) | 1825(1)  | 16(1) |

**Table 17.** Selected bond lengths [Å] and angles [°] for compound 3.

|   |             |           |
|---|-------------|-----------|
|   | Cu(1)-Cl(1) | 2.2432(3) |
| 5 | Cu(1)-Cl(4) | 2.2475(3) |
|   | Cu(1)-Cl(2) | 2.2521(2) |
|   | Cu(1)-Cl(3) | 2.2568(3) |

**Table 18.** Bond lengths [Å] and angles [°] for compound 3.

|    |                     |             |
|----|---------------------|-------------|
|    | Cu(1)-Cl(1)         | 2.2432(3)   |
|    | Cu(1)-Cl(4)         | 2.2475(3)   |
|    | Cu(1)-Cl(2)         | 2.2521(2)   |
| 15 | Cu(1)-Cl(3)         | 2.2568(3)   |
|    | O(1S)-H(1SA)        | 0.77(2)     |
|    | O(1S)-H(1SB)        | 0.78(2)     |
|    | N(1)-C(6)           | 1.4927(13)  |
|    | N(1)-C(2)           | 1.4941(13)  |
| 20 | N(1)-H(1A)          | 0.886(16)   |
|    | N(1)-H(1B)          | 0.850(16)   |
|    | N(7)-C(12)          | 1.4956(13)  |
|    | N(7)-C(8)           | 1.4968(13)  |
| 25 | N(7)-H(7A)          | 0.833(15)   |
|    | N(7)-H(7B)          | 0.898(15)   |
|    | C(2)-C(3)           | 1.5166(14)  |
|    | C(2)-H(2A)          | 0.9900      |
|    | C(2)-H(2B)          | 0.9900      |
|    | C(3)-C(4)           | 1.5304(13)  |
| 30 | C(3)-H(3A)          | 0.9900      |
|    | C(3)-H(3B)          | 0.9900      |
|    | C(4)-C(5)           | 1.5359(13)  |
|    | C(4)-C(4)#1         | 1.5396(18)  |
|    | C(4)-H(4)           | 1.0000      |
| 35 | C(5)-C(6)           | 1.5177(14)  |
|    | C(5)-H(5A)          | 0.9900      |
|    | C(5)-H(5B)          | 0.9900      |
|    | C(6)-H(6A)          | 0.9900      |
|    | C(6)-H(6B)          | 0.9900      |
| 40 | C(8)-C(9)           | 1.5190(13)  |
|    | C(8)-H(8A)          | 0.9900      |
|    | C(8)-H(8B)          | 0.9900      |
|    | C(9)-C(10)          | 1.5319(13)  |
|    | C(9)-H(9A)          | 0.9900      |
|    | C(9)-H(9B)          | 0.9900      |
| 45 | C(10)-C(11)         | 1.5314(14)  |
|    | C(10)-C(10)#2       | 1.5349(18)  |
|    | C(10)-H(10)         | 1.0000      |
|    | C(11)-C(12)         | 1.5204(13)  |
| 50 | C(11)-H(11A)        | 0.9900      |
|    | C(11)-H(11B)        | 0.9900      |
|    | C(12)-H(12A)        | 0.9900      |
|    | C(12)-H(12B)        | 0.9900      |
| 55 | Cl(1)-Cu(1)-Cl(4)   | 96.004(10)  |
|    | Cl(1)-Cu(1)-Cl(2)   | 134.842(10) |
|    | Cl(4)-Cu(1)-Cl(2)   | 98.472(9)   |
|    | Cl(1)-Cu(1)-Cl(3)   | 96.955(10)  |
|    | Cl(4)-Cu(1)-Cl(3)   | 139.402(10) |
| 60 | Cl(2)-Cu(1)-Cl(3)   | 99.129(9)   |
|    | H(1SA)-O(1S)-H(1SB) | 109.7(19)   |
|    | C(6)-N(1)-C(2)      | 111.91(8)   |
|    | C(6)-N(1)-H(1A)     | 109.4(10)   |
|    | C(2)-N(1)-H(1A)     | 110.1(10)   |
| 65 | C(6)-N(1)-H(1B)     | 108.0(10)   |
|    | C(2)-N(1)-H(1B)     | 111.8(11)   |
|    | H(1A)-N(1)-H(1B)    | 105.4(14)   |
|    | C(12)-N(7)-C(8)     | 112.57(8)   |
|    | C(12)-N(7)-H(7A)    | 109.8(10)   |

|     |                     |           |
|-----|---------------------|-----------|
| 70  | C(8)-N(7)-H(7A)     | 108.6(10) |
|     | C(12)-N(7)-H(7B)    | 108.8(10) |
|     | C(8)-N(7)-H(7B)     | 110.4(9)  |
|     | H(7A)-N(7)-H(7B)    | 106.5(13) |
|     | N(1)-C(2)-C(3)      | 110.22(8) |
| 75  | N(1)-C(2)-H(2A)     | 109.6     |
|     | C(3)-C(2)-H(2A)     | 109.6     |
|     | N(1)-C(2)-H(2B)     | 109.6     |
|     | C(3)-C(2)-H(2B)     | 109.6     |
|     | H(2A)-C(2)-H(2B)    | 108.1     |
| 80  | C(2)-C(3)-C(4)      | 112.75(8) |
|     | C(2)-C(3)-H(3A)     | 109.0     |
|     | C(4)-C(3)-H(3A)     | 109.0     |
|     | C(2)-C(3)-H(3B)     | 109.0     |
|     | C(4)-C(3)-H(3B)     | 109.0     |
| 85  | H(3A)-C(3)-H(3B)    | 107.8     |
|     | C(3)-C(4)-C(5)      | 109.22(8) |
|     | C(3)-C(4)-C(4)#1    | 111.29(9) |
|     | C(5)-C(4)-C(4)#1    | 112.13(9) |
|     | C(3)-C(4)-H(4)      | 108.0     |
| 90  | C(5)-C(4)-H(4)      | 108.0     |
|     | C(4)#1-C(4)-H(4)    | 108.0     |
|     | C(6)-C(5)-C(4)      | 112.55(8) |
|     | C(6)-C(5)-H(5A)     | 109.1     |
|     | C(4)-C(5)-H(5A)     | 109.1     |
| 95  | C(6)-C(5)-H(5B)     | 109.1     |
|     | C(4)-C(5)-H(5B)     | 109.1     |
|     | H(5A)-C(5)-H(5B)    | 107.8     |
|     | N(1)-C(6)-C(5)      | 109.88(8) |
|     | N(1)-C(6)-H(6A)     | 109.7     |
| 100 | C(5)-C(6)-H(6A)     | 109.7     |
|     | N(1)-C(6)-H(6B)     | 109.7     |
|     | C(5)-C(6)-H(6B)     | 109.7     |
|     | H(6A)-C(6)-H(6B)    | 108.2     |
|     | N(7)-C(8)-C(9)      | 110.58(8) |
| 105 | N(7)-C(8)-H(8A)     | 109.5     |
|     | C(9)-C(8)-H(8A)     | 109.5     |
|     | N(7)-C(8)-H(8B)     | 109.5     |
|     | C(9)-C(8)-H(8B)     | 109.5     |
|     | H(8A)-C(8)-H(8B)    | 108.1     |
| 110 | C(8)-C(9)-C(10)     | 111.65(8) |
|     | C(8)-C(9)-H(9A)     | 109.3     |
|     | C(10)-C(9)-H(9A)    | 109.3     |
|     | C(8)-C(9)-H(9B)     | 109.3     |
|     | C(10)-C(9)-H(9B)    | 109.3     |
| 115 | H(9A)-C(9)-H(9B)    | 108.0     |
|     | C(11)-C(10)-C(9)    | 107.84(7) |
|     | C(11)-C(10)-C(10)#2 | 111.82(9) |
|     | C(9)-C(10)-C(10)#2  | 112.76(9) |
|     | C(11)-C(10)-H(10)   | 108.1     |
| 120 | C(9)-C(10)-H(10)    | 108.1     |
|     | C(10)#2-C(10)-H(10) | 108.1     |
|     | C(12)-C(11)-C(10)   | 112.24(8) |
|     | C(12)-C(11)-H(11A)  | 109.2     |
|     | C(10)-C(11)-H(11A)  | 109.2     |
| 125 | C(12)-C(11)-H(11B)  | 109.2     |
|     | C(10)-C(11)-H(11B)  | 109.2     |
|     | H(11A)-C(11)-H(11B) | 107.9     |
|     | N(7)-C(12)-C(11)    | 110.83(8) |
|     | N(7)-C(12)-H(12A)   | 109.5     |
| 130 | C(11)-C(12)-H(12A)  | 109.5     |
|     | N(7)-C(12)-H(12B)   | 109.5     |
|     | C(11)-C(12)-H(12B)  | 109.5     |
|     | H(12A)-C(12)-H(12B) | 108.1     |

135 Symmetry transformations used to generate equivalent atoms:

#1 -x+2,-y,-z+1 #2 -x,-y+1,-z+1

**Table 19.** Anisotropic displacement parameters ( $\text{\AA}^2 \times 10^3$ ) for compound **3**. The anisotropic displacement factor exponent takes the form:  $-2p_2[h^2 a^* 2U_{11} + \dots + 2h k a^* b^* U_{12}]$

|    | U <sup>11</sup> | U <sup>22</sup> | U <sup>33</sup> | U <sup>23</sup> | U <sup>13</sup> | U <sup>12</sup> |
|----|-----------------|-----------------|-----------------|-----------------|-----------------|-----------------|
| 5  |                 |                 |                 |                 |                 |                 |
|    | Cu(1)           | 12(1)           | 11(1)           | 10(1)           | -2(1)           | -1(1)           |
|    | Cl(1)           | 15(1)           | 18(1)           | 15(1)           | -3(1)           | -1(1)           |
|    | Cl(2)           | 14(1)           | 11(1)           | 14(1)           | -2(1)           | 1(1)            |
| 10 | Cl(3)           | 20(1)           | 16(1)           | 12(1)           | -5(1)           | 1(1)            |
|    | Cl(4)           | 15(1)           | 15(1)           | 12(1)           | -2(1)           | -4(1)           |
|    | O(1S)           | 21(1)           | 16(1)           | 44(1)           | -2(1)           | -9(1)           |
|    | N(1)            | 12(1)           | 16(1)           | 15(1)           | -3(1)           | -3(1)           |
|    | N(7)            | 12(1)           | 16(1)           | 12(1)           | -3(1)           | 3(1)            |
| 15 | C(2)            | 13(1)           | 18(1)           | 15(1)           | 1(1)            | -1(1)           |
|    | C(3)            | 11(1)           | 16(1)           | 12(1)           | -2(1)           | -1(1)           |
|    | C(4)            | 10(1)           | 11(1)           | 12(1)           | -4(1)           | -2(1)           |
|    | C(5)            | 11(1)           | 18(1)           | 14(1)           | -2(1)           | -1(1)           |
|    | C(6)            | 12(1)           | 19(1)           | 14(1)           | -4(1)           | -1(1)           |
| 20 | C(8)            | 11(1)           | 18(1)           | 13(1)           | -3(1)           | 1(1)            |
|    | C(9)            | 10(1)           | 17(1)           | 12(1)           | -4(1)           | 1(1)            |
|    | C(10)           | 11(1)           | 11(1)           | 11(1)           | -2(1)           | 1(1)            |
|    | C(11)           | 12(1)           | 19(1)           | 12(1)           | -4(1)           | 0(1)            |
| 25 | C(12)           | 13(1)           | 24(1)           | 13(1)           | -7(1)           | 1(1)            |

**Table 20.** Hydrogen coordinates ( $\times 10^4$ ) and isotropic displacement parameters ( $\text{\AA}^2 \times 10^{-3}$ ) for compound **3**.

|    | x      | y        | z        | U(eq)    |       |
|----|--------|----------|----------|----------|-------|
| 30 |        |          |          |          |       |
|    | H(1SA) | 2410(20) | 9050(20) | 1160(20) | 41(5) |
|    | H(1SB) | 3430(20) | 8480(20) | 1970(20) | 49(6) |
|    | H(2A)  | 8645     | 2770     | 2200     | 19    |
|    | H(2B)  | 8948     | 1788     | 1017     | 19    |
| 35 | H(3A)  | 10776    | 1139     | 2720     | 16    |
|    | H(3B)  | 9926     | -245     | 2706     | 16    |
|    | H(4)   | 9430     | 1534     | 4804     | 13    |
|    | H(5A)  | 7879     | -924     | 4743     | 17    |
|    | H(5B)  | 7588     | 67       | 5914     | 17    |
| 40 | H(6A)  | 5785     | 755      | 4189     | 18    |
|    | H(6B)  | 6676     | 2120     | 4185     | 18    |
|    | H(8A)  | 4188     | 5033     | 3647     | 18    |
|    | H(8B)  | 3365     | 3603     | 3739     | 18    |
|    | H(9A)  | 2023     | 6303     | 4454     | 16    |
| 45 | H(9B)  | 2400     | 4783     | 5591     | 16    |
|    | H(10)  | 677      | 3659     | 4619     | 13    |
|    | H(11A) | -788     | 5095     | 2781     | 17    |
|    | H(11B) | 51       | 6501     | 2739     | 17    |
|    | H(12A) | 1346     | 3837     | 1924     | 19    |
| 50 | H(12B) | 1022     | 5409     | 846      | 19    |
|    | H(7A)  | 3409(17) | 4965(16) | 1482(16) | 22(4) |
|    | H(7B)  | 2776(16) | 6286(17) | 1811(16) | 23(4) |
|    | H(1A)  | 7210(17) | 344(18)  | 2223(17) | 28(4) |
| 55 | H(1B)  | 6547(18) | 1783(17) | 1934(17) | 27(4) |

**Table 21.** Hydrogen bonds for compound **3** [ $\text{\AA}$  and  $^\circ$ ].

|    | D-H...A                       | d(D-H)    | d(H...A)  | d(D...A)   | <(DHA)    |
|----|-------------------------------|-----------|-----------|------------|-----------|
| 65 |                               |           |           |            |           |
|    | O(1S)-H(1SA)...Cl(1)#3        | 0.77(2)   | 2.45(2)   | 3.2107(10) | 176.7(18) |
| 70 | O(1S)-H(1SB)...Cl(3)          | 0.78(2)   | 2.45(2)   | 3.1892(10) | 158.2(19) |
|    | N(7)-H(7A)...Cl(2)#40.833(15) | 0.833(15) | 2.699(15) | 3.3428(9)  | 135.3(13) |
|    | N(7)-H(7A)...Cl(4)#40.833(15) | 0.833(15) | 2.749(15) | 3.3261(9)  | 127.9(12) |
|    | N(7)-H(7B)...O(1S)            | 0.898(15) | 1.891(15) | 2.7798(12) | 170.0(14) |
| 75 | N(1)-H(1A)...Cl(1)#50.886(16) | 0.886(16) | 2.522(16) | 3.2546(9)  | 140.4(13) |
|    | N(1)-H(1A)...Cl(3)#50.886(16) | 0.886(16) | 2.720(16) | 3.4443(9)  | 139.7(13) |
|    | N(1)-H(1B)...Cl(4)#40.850(16) | 0.850(16) | 2.460(16) | 3.1719(9)  | 141.8(14) |
|    | N(1)-H(1B)...Cl(2)            | 0.850(16) | 2.928(16) | 3.4592(9)  | 122.4(12) |

80 Symmetry transformations used to generate equivalent atoms:

- #1 -x+2,-y,-z+1 #2 -x,-y+1,-z+1 #3 -x+1,-y+2,-z  
 #4 -x+1,-y+1,-z #5 x,y-1,z



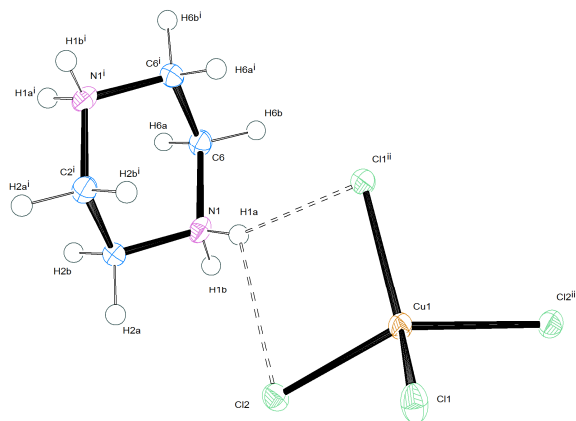

**Figure 4.** Showing the atomic thermal ellipsoid plot (50% probability level) and atomic numbering scheme for compound 4.

**Table 22.** Crystal data and structure refinement for compound 4.

|                                   |                                                                  |                                                                         |
|-----------------------------------|------------------------------------------------------------------|-------------------------------------------------------------------------|
| Identification code               | 4                                                                |                                                                         |
| Empirical formula                 | C <sub>4</sub> H <sub>12</sub> Cl <sub>3</sub> Cu N <sub>2</sub> |                                                                         |
| Formula weight                    | 258.05                                                           |                                                                         |
| Temperature                       | 100(2) K                                                         |                                                                         |
| Wavelength                        | 0.71073 Å                                                        |                                                                         |
| Crystal system                    | Monoclinic                                                       |                                                                         |
| Space group                       | C 2/c                                                            |                                                                         |
| Unit cell dimensions              | a = 10.9151(9) Å<br>b = 6.7334(6) Å<br>c = 12.1914(10) Å         | $\alpha = 90^\circ$<br>$\beta = 96.197(5)^\circ$<br>$\gamma = 90^\circ$ |
| Volume                            | 890.78(13) Å <sup>3</sup>                                        |                                                                         |
| Z                                 | 4                                                                |                                                                         |
| Density (calculated)              | 1.924 Mg/m <sup>3</sup>                                          |                                                                         |
| Absorption coefficient            | 3.281 mm <sup>-1</sup>                                           |                                                                         |
| F(000)                            | 520                                                              |                                                                         |
| Crystal size                      | 0.23 x 0.18 x 0.12 mm <sup>3</sup>                               |                                                                         |
| Theta range for data collection   | 3.36 to 33.21°                                                   |                                                                         |
| Index ranges                      | -16 ≤ h ≤ 16, -10 ≤ k ≤ 10, -18 ≤ l ≤ 18                         |                                                                         |
| Reflections collected             | 5934                                                             |                                                                         |
| Independent reflections           | 1706 [R(int) = 0.0520]                                           |                                                                         |
| Completeness to theta = 33.21°    | 99.6 %                                                           |                                                                         |
| Absorption correction             | Numerical                                                        |                                                                         |
| Max. and min. transmission        | 0.6942 and 0.5165                                                |                                                                         |
| Refinement method                 | Full-matrix least-squares on F <sup>2</sup>                      |                                                                         |
| Data / restraints / parameters    | 1706 / 0 / 55                                                    |                                                                         |
| Goodness-of-fit on F <sup>2</sup> | 1.022                                                            |                                                                         |
| Final R indices [I > 2σ(I)]       | R1 = 0.0352, wR2 = 0.0618                                        |                                                                         |
| R indices (all data)              | R1 = 0.0527, wR2 = 0.0678                                        |                                                                         |
| Largest diff. peak and hole       | 0.575 and -0.741 e.Å <sup>-3</sup>                               |                                                                         |

**Table 23.** Atomic coordinates ( $\times 10^4$ ) and equivalent isotropic displacement parameters ( $\text{\AA}^2 \times 10^3$ ) for compound 4. U(eq) is defined as one third of the trace of the orthogonalized U<sup>ij</sup> tensor.

|       | x       | y       | z       | U(eq) |
|-------|---------|---------|---------|-------|
| Cu(1) | 5000    | 5691(1) | 2500    | 17(1) |
| Cl(1) | 5000    | 8927(1) | 2500    | 13(1) |
| Cl(2) | 3943(1) | 3698(1) | 3583(1) | 13(1) |
| N(1)  | 1938(1) | 6933(3) | 3930(1) | 11(1) |
| C(2)  | 1507(2) | 6071(3) | 4951(1) | 13(1) |
| C(6)  | 2554(2) | 6033(3) | 5873(1) | 12(1) |

**Table 24.** Selected bond lengths [Å] and angles [°] for compound 4.

|             |           |
|-------------|-----------|
| Cu(1)-Cl(1) | 2.1792(9) |
| Cu(1)-Cl(2) | 2.2816(5) |

**Table 25.** Bond lengths [Å] and angles [°] for compound 4.

|    |                     |             |
|----|---------------------|-------------|
|    | Cu(1)-Cl(1)         | 2.1792(9)   |
|    | Cu(1)-Cl(2)         | 2.2816(5)   |
|    | Cu(1)-Cl(2)#1       | 2.2816(5)   |
| 5  | N(1)-C(6)#2         | 1.487(3)    |
|    | N(1)-C(2)           | 1.495(2)    |
|    | N(1)-H(1A)          | 0.89(2)     |
|    | N(1)-H(1B)          | 0.82(3)     |
|    | C(2)-C(6)           | 1.515(2)    |
| 10 | C(2)-H(2A)          | 0.9900      |
|    | C(2)-H(2B)          | 0.9900      |
|    | C(6)-N(1)#2         | 1.487(3)    |
|    | C(6)-H(6A)          | 0.9900      |
|    | C(6)-H(6B)          | 0.9900      |
| 15 | Cl(1)-Cu(1)-Cl(2)   | 126.036(15) |
|    | Cl(1)-Cu(1)-Cl(2)#1 | 126.035(15) |
|    | Cl(2)-Cu(1)-Cl(2)#1 | 107.93(3)   |
| 20 | C(6)#2-N(1)-C(2)    | 111.61(14)  |
|    | C(6)#2-N(1)-H(1A)   | 110.4(17)   |
|    | C(2)-N(1)-H(1A)     | 109.7(14)   |
|    | C(6)#2-N(1)-H(1B)   | 111.4(17)   |
|    | C(2)-N(1)-H(1B)     | 112.0(17)   |
|    | H(1A)-N(1)-H(1B)    | 101(2)      |
| 25 | N(1)-C(2)-C(6)      | 110.15(14)  |
|    | N(1)-C(2)-H(2A)     | 109.6       |
|    | C(6)-C(2)-H(2A)     | 109.6       |
|    | N(1)-C(2)-H(2B)     | 109.6       |
|    | C(6)-C(2)-H(2B)     | 109.6       |
| 30 | H(2A)-C(2)-H(2B)    | 108.1       |
|    | N(1)#2-C(6)-C(2)    | 110.03(16)  |
|    | N(1)#2-C(6)-H(6A)   | 109.7       |
|    | C(2)-C(6)-H(6A)     | 109.7       |
|    | N(1)#2-C(6)-H(6B)   | 109.7       |
| 35 | C(2)-C(6)-H(6B)     | 109.7       |
|    | H(6A)-C(6)-H(6B)    | 108.2       |

Symmetry transformations used to generate equivalent atoms:

#1 -x+1,y,-z+1/2 #2 -x+1/2,-y+3/2,-z+1

**Table 26.** Anisotropic displacement parameters ( $\text{\AA}^2 \times 10^3$ ) for compound 4. The anisotropic displacement factor exponent takes the form:  $-2p_2[h^2 a^*2U_{11} + \dots + 2 h k a^* b^* U_{12}]$

|    | U11   | U22   | U33   | U23   | U13   | U12   |       |
|----|-------|-------|-------|-------|-------|-------|-------|
| 45 | Cu(1) | 17(1) | 10(1) | 21(1) | 0     | -6(1) | 0     |
|    | Cl(1) | 15(1) | 9(1)  | 15(1) | 0     | 0(1)  | 0     |
|    | Cl(2) | 14(1) | 11(1) | 13(1) | 0(1)  | 1(1)  | 2(1)  |
|    | N(1)  | 12(1) | 10(1) | 9(1)  | -1(1) | -1(1) | 2(1)  |
|    | C(2)  | 12(1) | 14(1) | 13(1) | 2(1)  | 0(1)  | -5(1) |
| 50 | C(6)  | 13(1) | 12(1) | 11(1) | 3(1)  | 0(1)  | 0(1)  |

**Table 27.** Hydrogen coordinates ( $\times 10^4$ ) and isotropic displacement parameters ( $\text{\AA}^2 \times 10^{-3}$ ) for compound 4.

|    | x     | y        | z        | U(eq)    |       |
|----|-------|----------|----------|----------|-------|
| 55 | H(1A) | 1322(19) | 6950(40) | 3393(17) | 15(5) |
|    | H(1B) | 2430(20) | 6210(40) | 3666(18) | 21(6) |
|    | H(2A) | 1200     | 4704     | 4800     | 15    |
| 60 | H(2B) | 819      | 6879     | 5178     | 15    |
|    | H(6A) | 2251     | 5523     | 6556     | 14    |
|    | H(6B) | 3212     | 5133     | 5673     | 14    |

**Table 28.** Hydrogen bonds for compound 4 [Å and °].

|    | D-H...A              | d(D-H)  | d(H...A) | d(D...A)   | <(DHA)    |
|----|----------------------|---------|----------|------------|-----------|
| 70 | N(1)-H(1A)...Cl(1)#3 | 0.89(2) | 2.66(2)  | 3.2882(17) | 129(2)    |
|    | N(1)-H(1A)...Cl(2)#4 | 0.89(2) | 2.67(2)  | 3.3293(15) | 132.1(18) |
|    | N(1)-H(1A)...Cl(2)#5 | 0.89(2) | 2.88(2)  | 3.4616(16) | 124.2(16) |
|    | N(1)-H(1B)...Cl(2)   | 0.82(3) | 2.37(3)  | 3.1483(18) | 159(2)    |

Symmetry transformations used to generate equivalent atoms: #1 -x+1,y,-z+1/2 #2 -x+1/2,-y+3/2,-z+1 #3 x-1/2,y-1/2,z #4 -x+1/2,y+1/2,-z+1/2 #5 x-1/2,y+1/2,z

<sup>a</sup> Department of Chemistry, University of Jyväskylä, P.O.Box 35, FI-40014, University of Jyväskylä, Finland; E-mail: [matti.tuikka@jyu.fi](mailto:matti.tuikka@jyu.fi)

<sup>b</sup> School of Chemical Technology, Aalto University, FI-00076 Aalto, Finland E-mail: [ukersen@hotmail.com](mailto:ukersen@hotmail.com)

<sup>c</sup> Department of Chemistry, University of Jyväskylä, P.O.Box 35, FI-40014, University of Jyväskylä, Finland; E-mail: [matti.o.haukka@jyu.fi](mailto:matti.o.haukka@jyu.fi)
